# Supplementary material
Source: PubMed Central journal article supplement (PMC3443394)

**Figure S1**

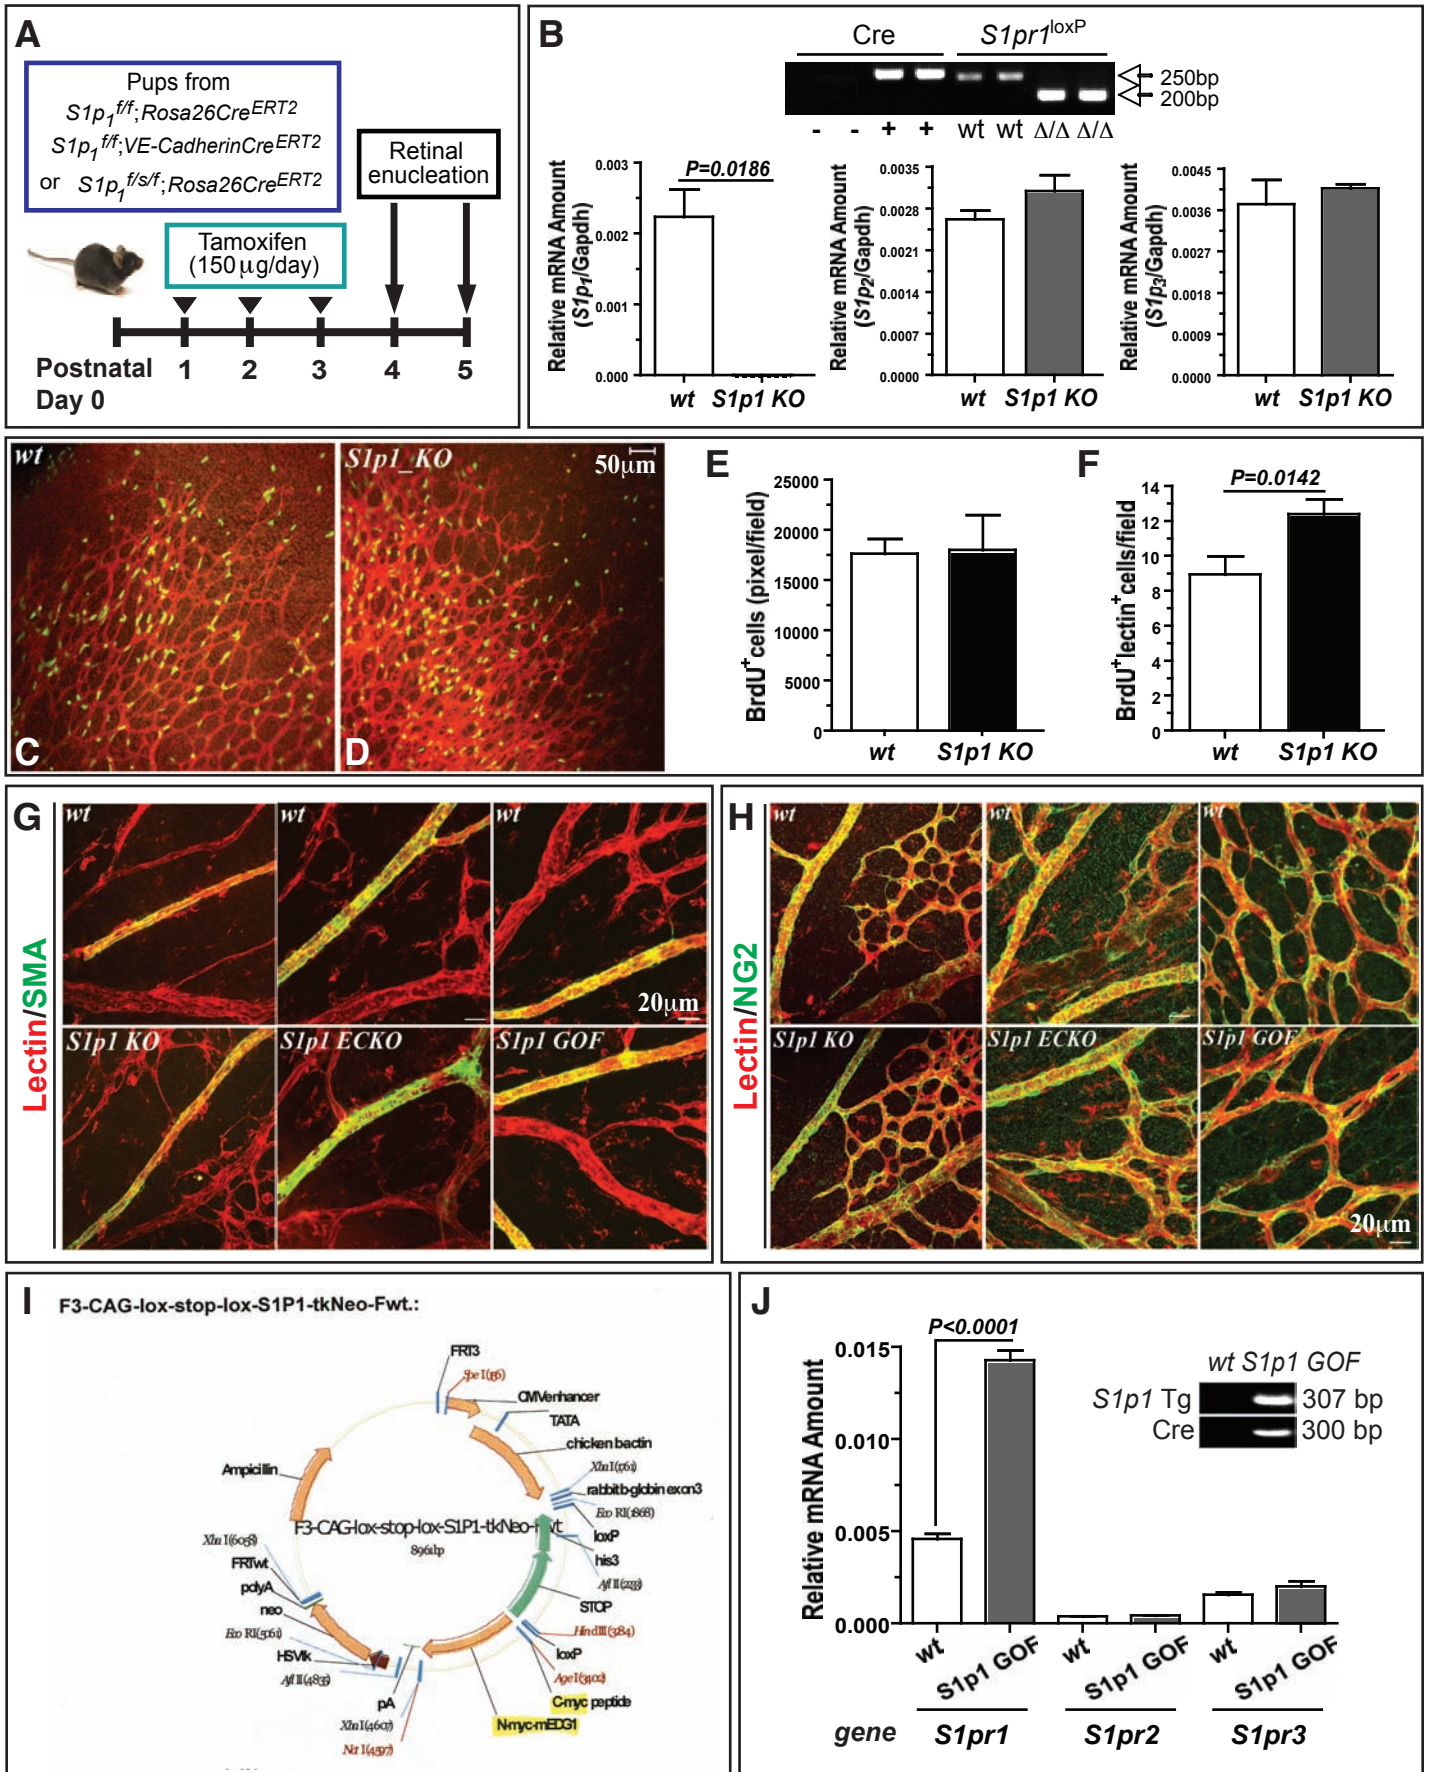

Figure S2

A

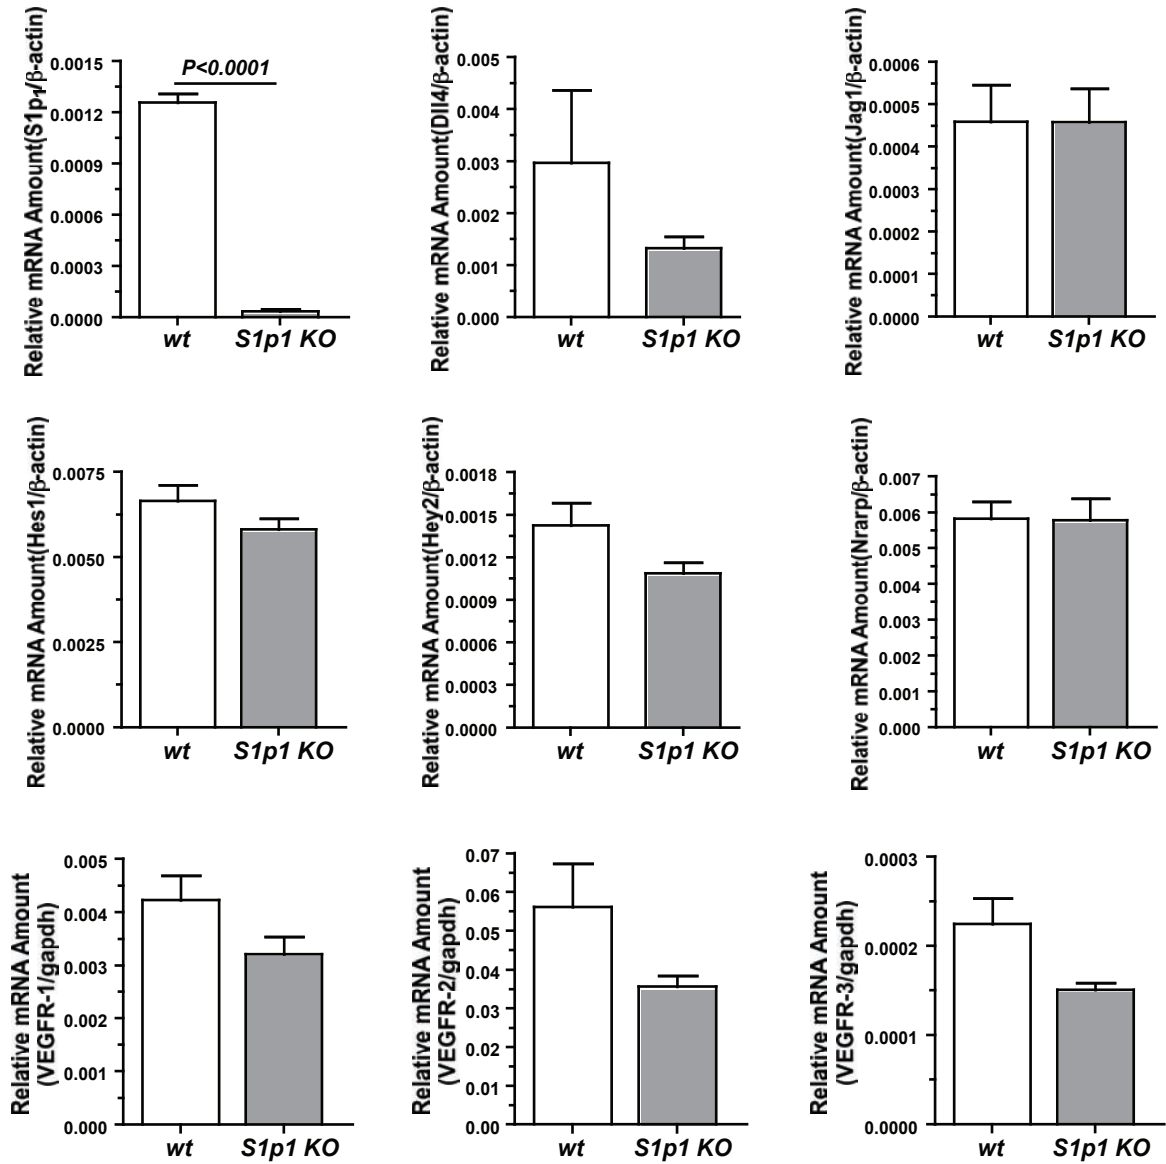

B

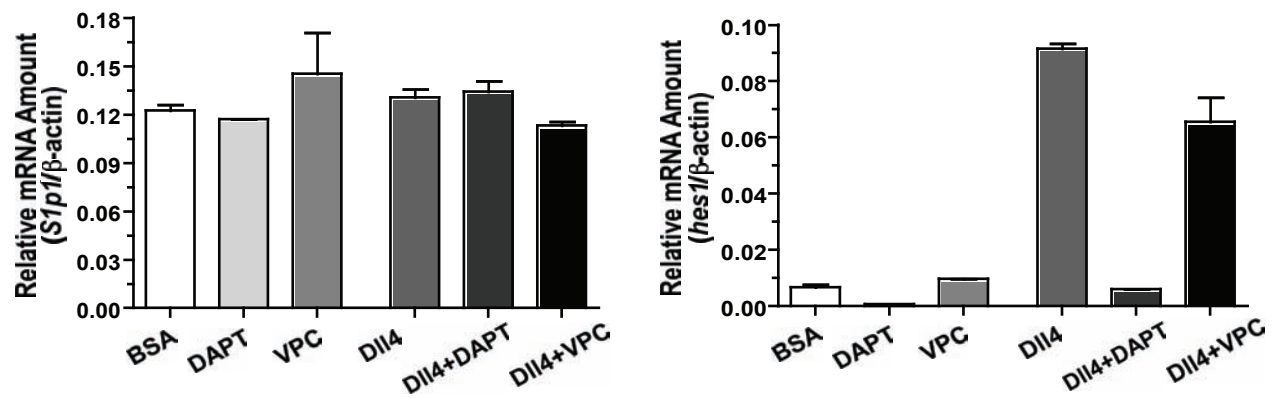

Figure S3

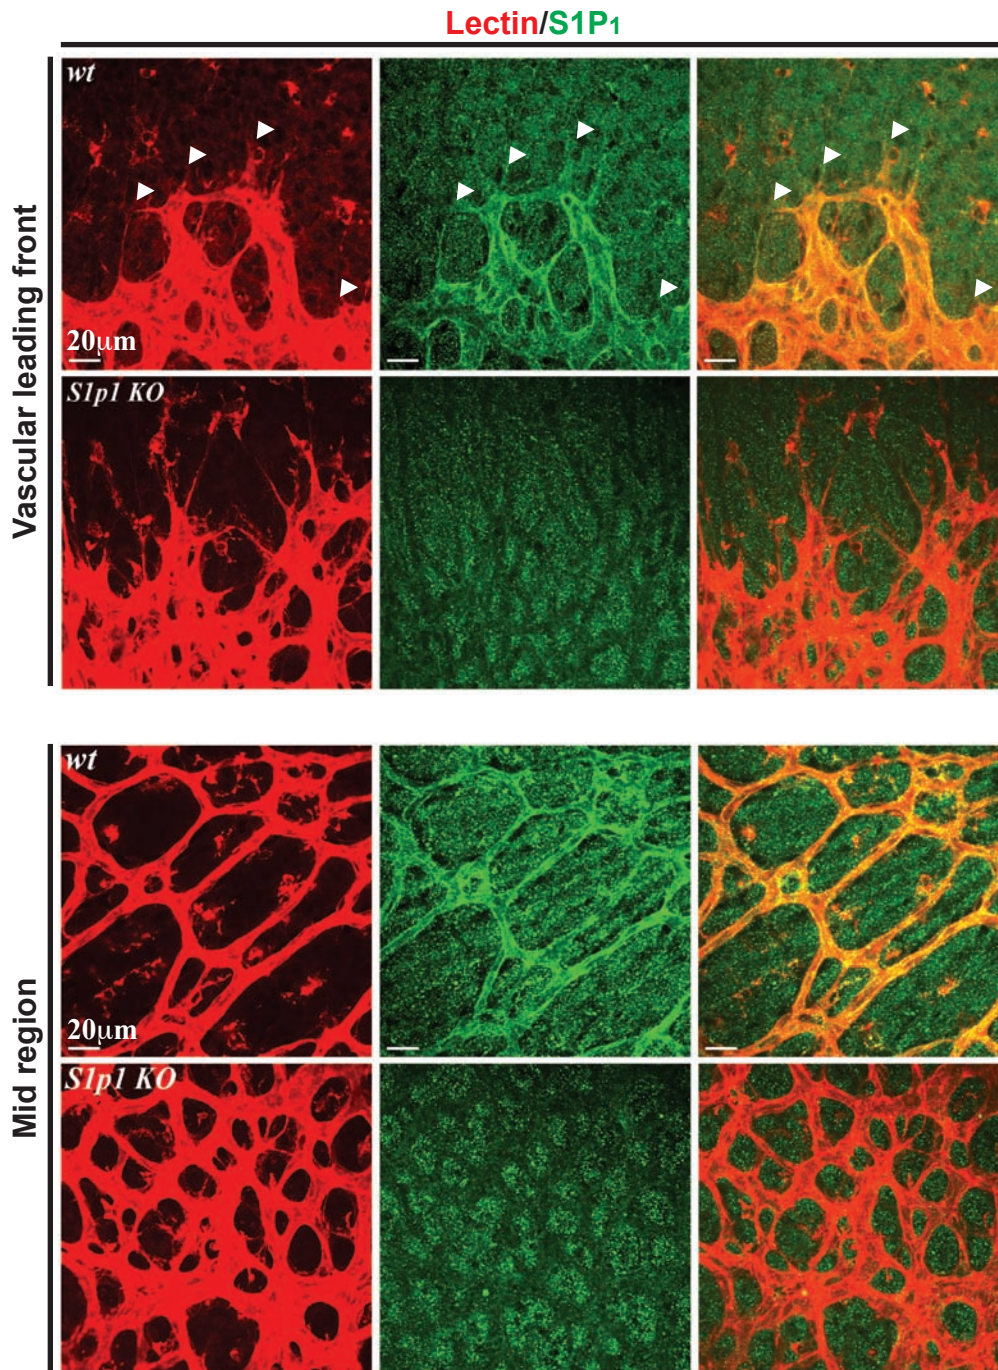

Figure S4

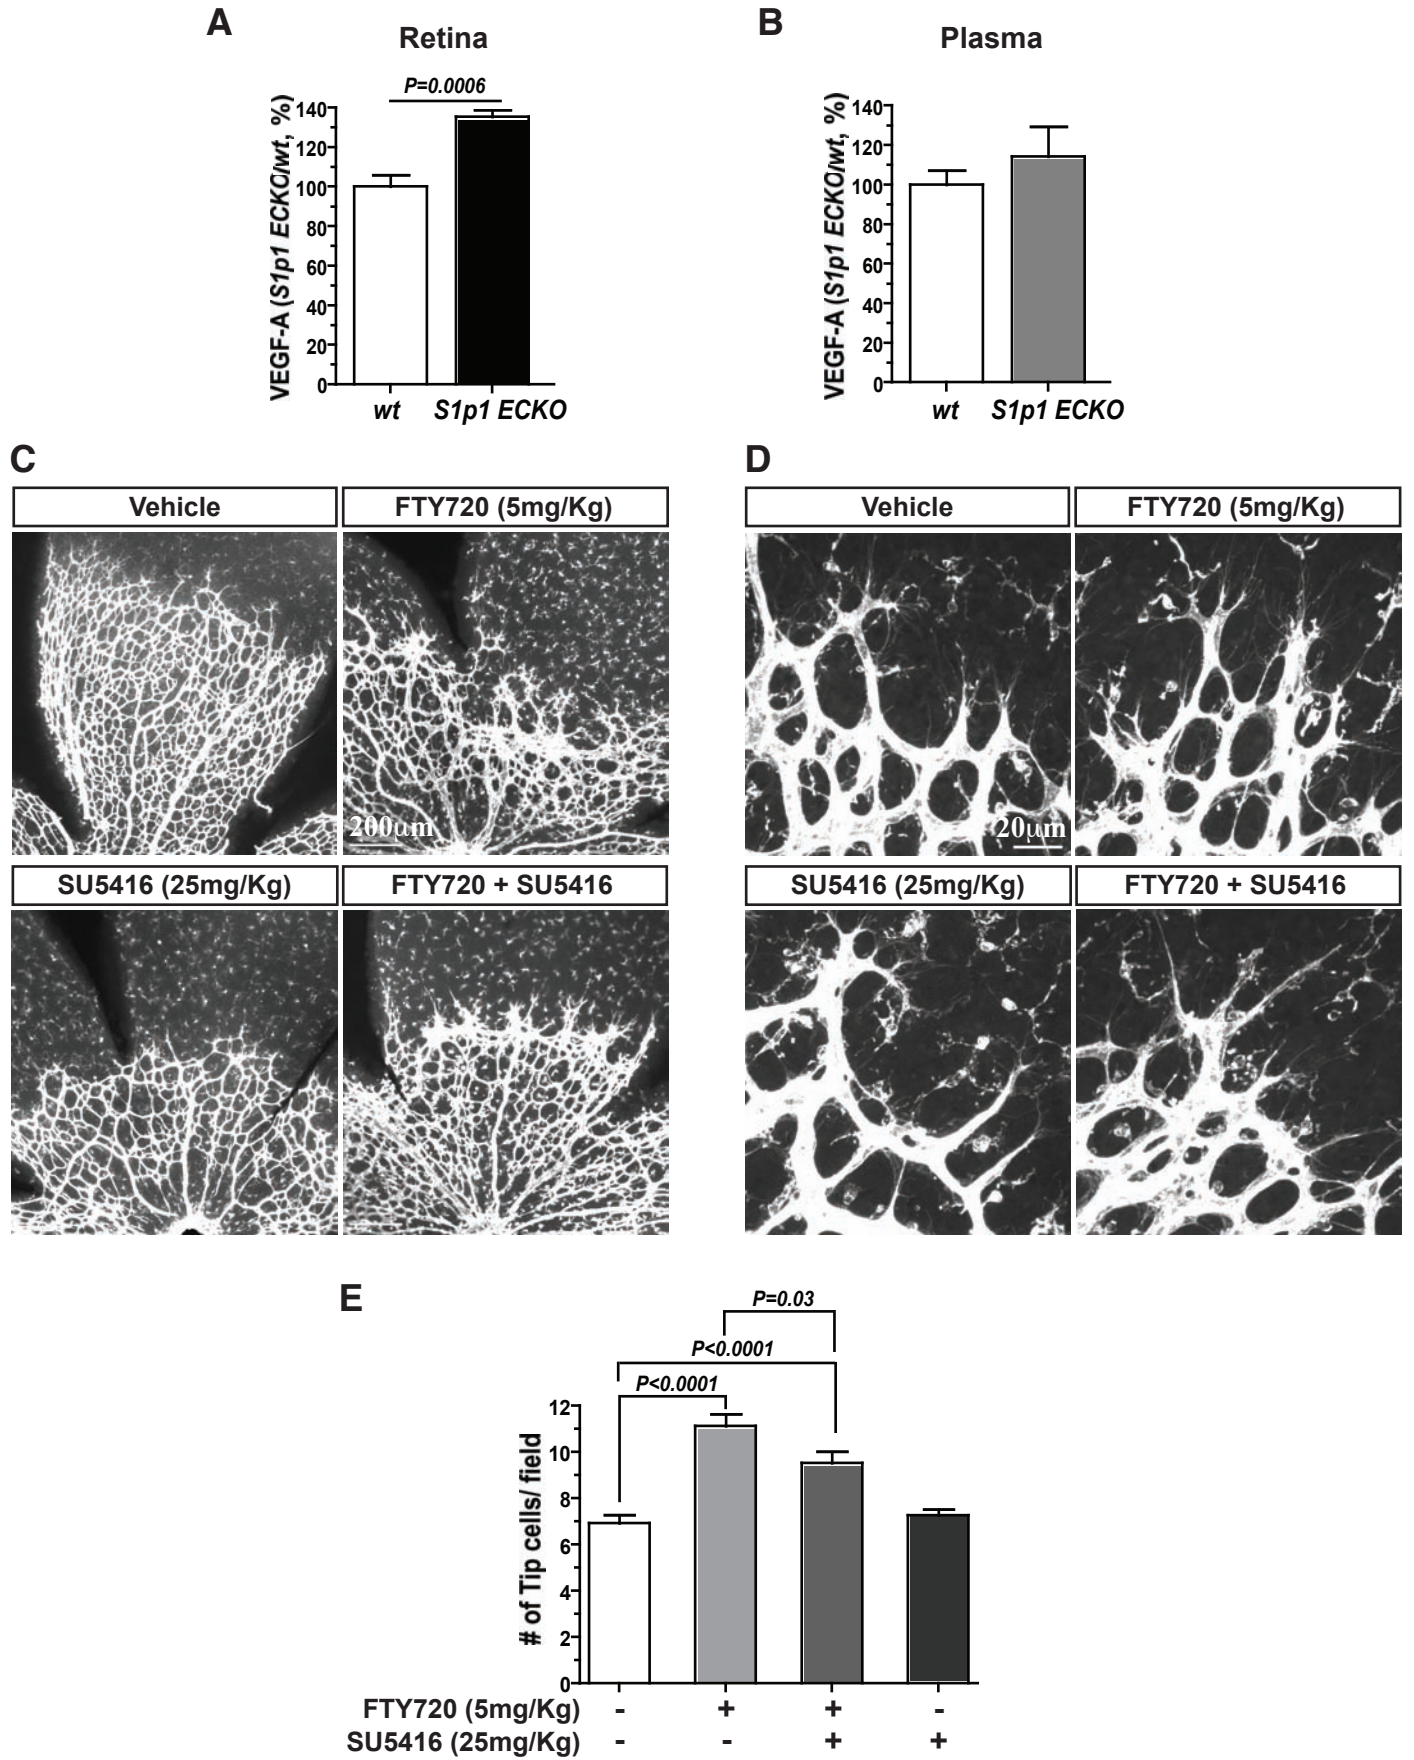

Figure S5

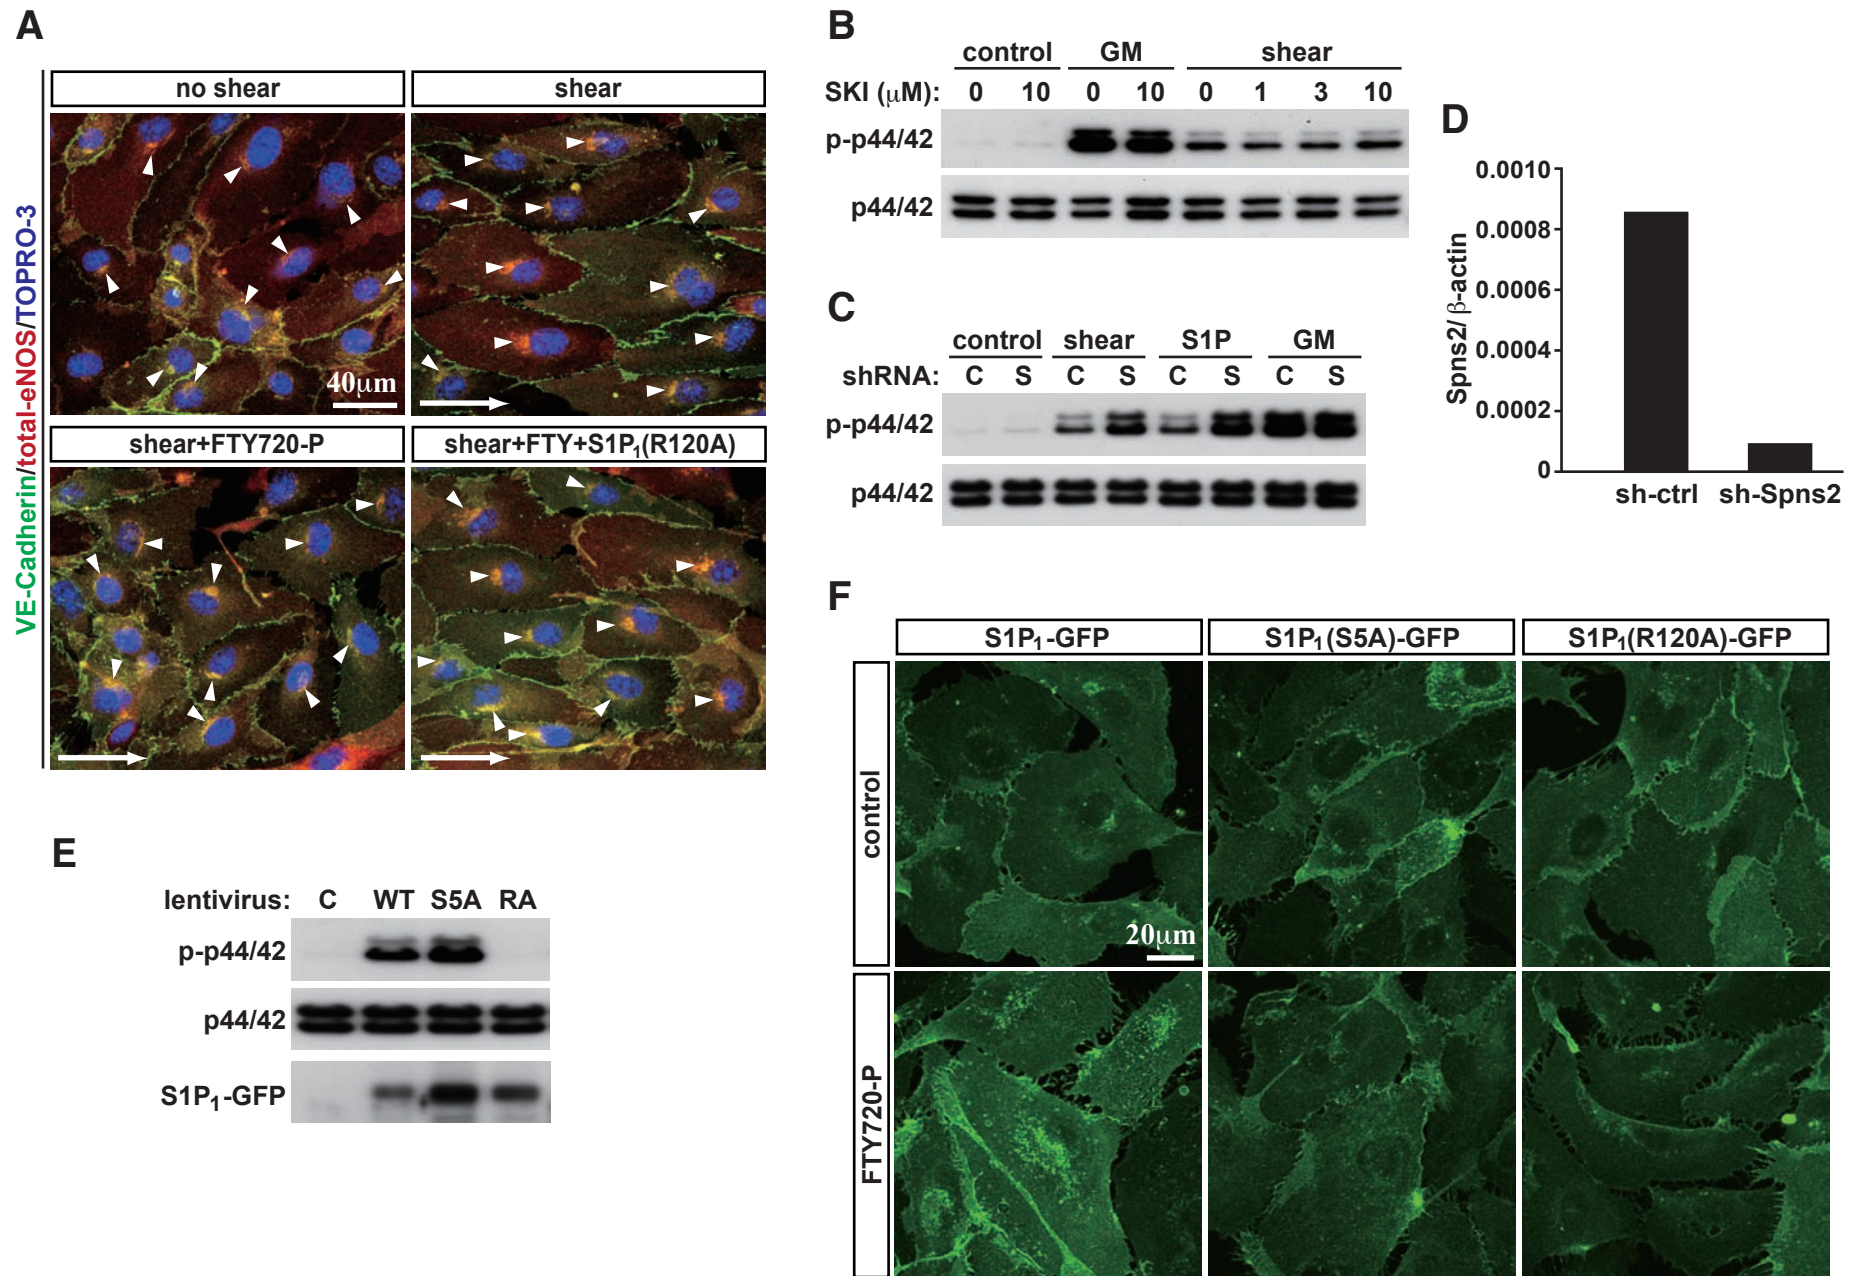

Supplement: NIHMS398462-supplement-01.pdf [file NIHMS398462-supplement-01.pdf]
